# Supplementary material
Source: PubMed Central journal article supplement (PMC7611547)
Supplement: EMS114735-supplement-Supplementary_material.pdf [file EMS114735-supplement-Supplementary_material.pdf]

## Supplemental information

### Supplementary Results

#### *Influence of pre- and post-assessment interval*

To formally check for potential influences of time between pre-and post-assessment. we ran two post-hoc regression analyses on the extracted beta-values from the left aPFC cluster (xyz -40, 58, 4, contrast:  $\Delta$ -PCL x time [follow-up vs. baseline] x congruency [incongruent > congruent], see table S2) and amygdala cluster (L xyz -28, -2, -16; R xyz 22, 2, -20, contrast:  $\Delta$ -PLES x time [follow-up vs. baseline] x congruency [incongruent > congruent], see table S2):

1. Symptom increase ( $\Delta$ -PCL)  $\sim$  [Left aPFC congruency effect wave 2 > wave 1] + symptoms at baseline + trauma load at baseline + trauma load increase + interval length

The relationship between the left aPFC congruency effect at baseline and symptom increase remained significant ( $B = 0.19, p = 0.001$ ) and interval length did not predict change in PTSD symptoms ( $B = 0.09, p = 0.24$ )

2. [Bilateral amygdala congruency effect wave 2 > wave 1]  $\sim$  trauma load at baseline + trauma load increase + symptom increase + symptoms at baseline + interval length

Also here, the relationship between trauma load increase and the amygdala congruency effect remained significant ( $B = 0.36, p = 0.002$ ) and interval length did not predict the change in amygdala congruency effect ( $B = -0.36, p = 0.48$ ).

#### *Potential moderating effect of amygdala activation*

Additionally, we conducted a moderation analysis on the beta-values (incongruent>congruent contrast) extracted from the prefrontal/aPFC clusters predicting PCL increase and the amygdala

volume of interest (see methods main article) to investigate whether amygdala activity moderated the association between baseline aPFC activity and symptom development. Amygdala activity during the baseline assessment did not moderate the relationship between aPFC and symptom increase (effect of the interaction between aPFC and amygdala on delta PCL:  $p = 0.87$ ), nor the relationship between the other frontal activation clusters and symptom increase (all  $p > 0.09$ ).

#### *Hierarchical regression analysis*

Additional hierarchical regression models were run to assess the added value of incorporating behavioral (congruency effects reaction times and error rates) and neural (congruency effect Left anterior PFC; extracted beta-values) in predicting PTSD symptom increase ( $\Delta$ -PCL). As a starting model, we used the baseline PTSD symptoms (PCL), baseline trauma exposure (baseline PLES) and trauma increase scores ( $\Delta$ -PLES)

First model: PTSD increase  $\sim$  Trauma load increase + Trauma load before baseline + PTSD symptoms before baseline. This model predicted PTSD significantly ( $F(3,181) = 8.95, R^2 = .13, p < .001$ )

| Predictor                                    | Beta   | p-value |
|----------------------------------------------|--------|---------|
| PTSD symptoms before baseline (PCL baseline) | -0.282 | < .001  |
| Trauma load before baseline (PLES baseline)  | 0.132  | .073    |
| Trauma load increase (delta PLES)            | 0.183  | .014    |

Second model: additional predictors error rate (congruency effect) + reaction times (congruency effect). This model was not significantly better than the first model ( $F(2,179) = 0.19, R^2\text{-change} = .002, p = .83$ ).

| Predictor                                    | Beta   | p-value |
|----------------------------------------------|--------|---------|
| PTSD symptoms before baseline (PCL baseline) | -0.282 | < .001  |
| Trauma load before baseline (PLES baseline)  | 0.131  | .081    |
| Trauma load increase (delta PLES)            | 0.190  | .012    |
| Error rate congruency effect                 | -0.025 | .723    |
| Reaction time congruency effect              | -0.032 | .656    |

Third model: additional predictor aPFC. This model was significantly better than the previous models.

( $F(1,178) = 11.627$ ,  $R^2$ -change = .053,  $p = .001$ )

| Predictor                                    | Beta   | p-value |
|----------------------------------------------|--------|---------|
| PTSD symptoms before baseline (PCL baseline) | -0.273 | < .001  |
| Trauma load before baseline (PLES baseline)  | 0.112  | .125    |
| Trauma load increase (delta PLES)            | 0.21   | .004    |
| Error rate congruency effect                 | -0.009 | .898    |
| Reaction time congruency effect              | -0.018 | .793    |
| Left aPFC cluster                            | -0.234 | .001    |

The outcome of this hierarchical regression analysis shows that although trauma exposure and preceding PTSD symptoms predict PTSD symptom development, the model including aPFC activity outperforms the other models.

Supplementary Figures

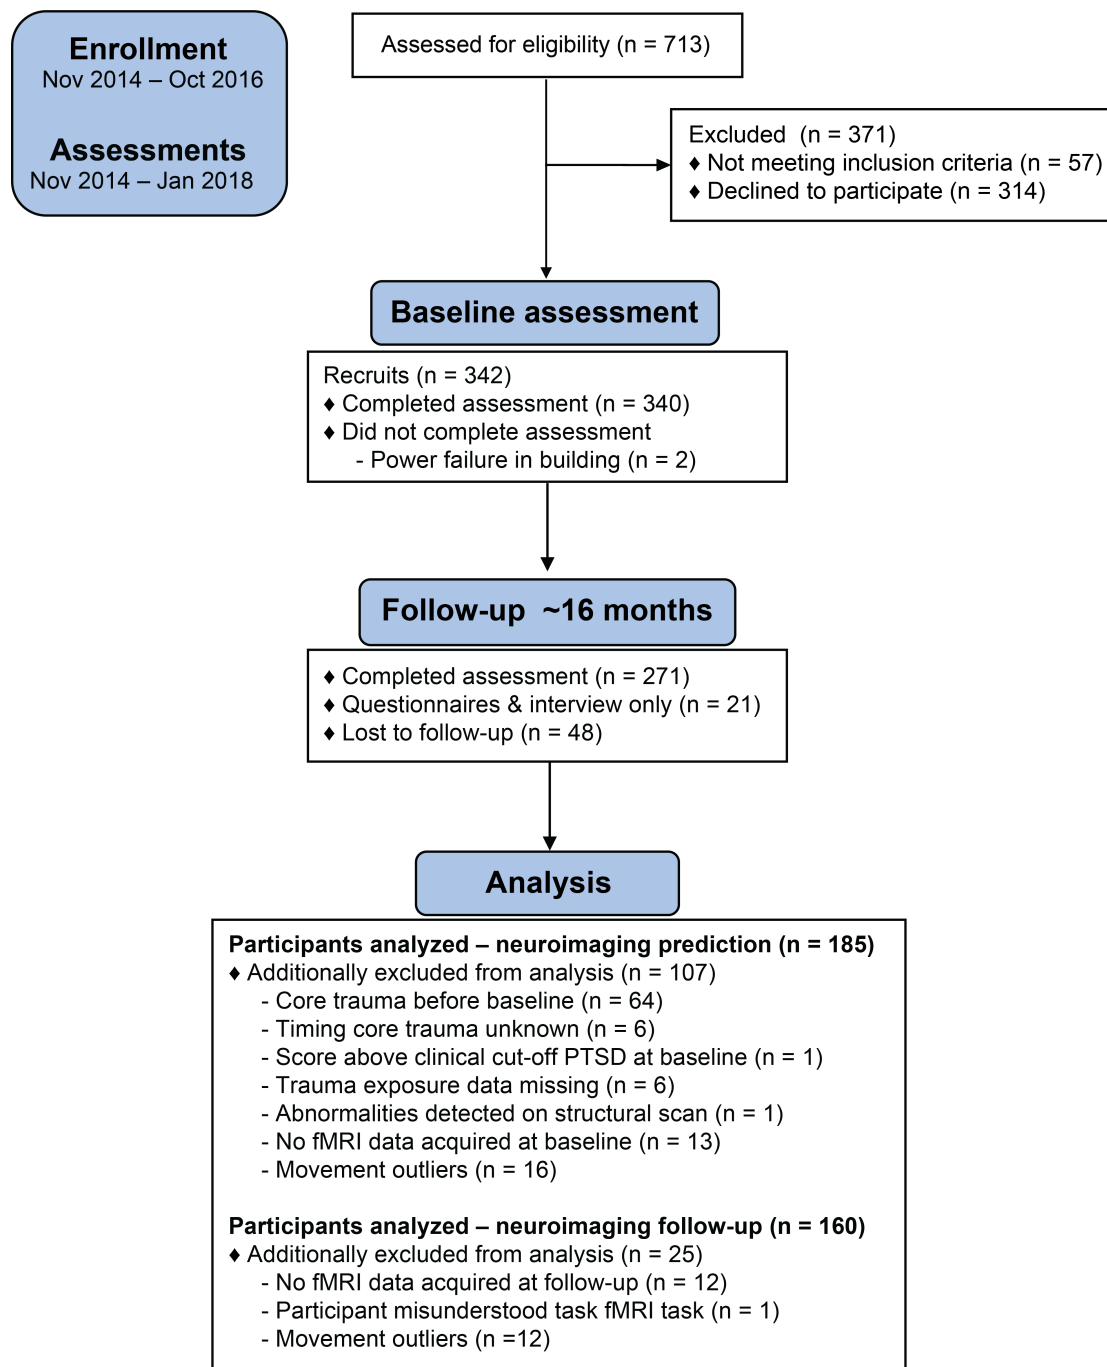

Supplementary figure 1. Consort flow diagram

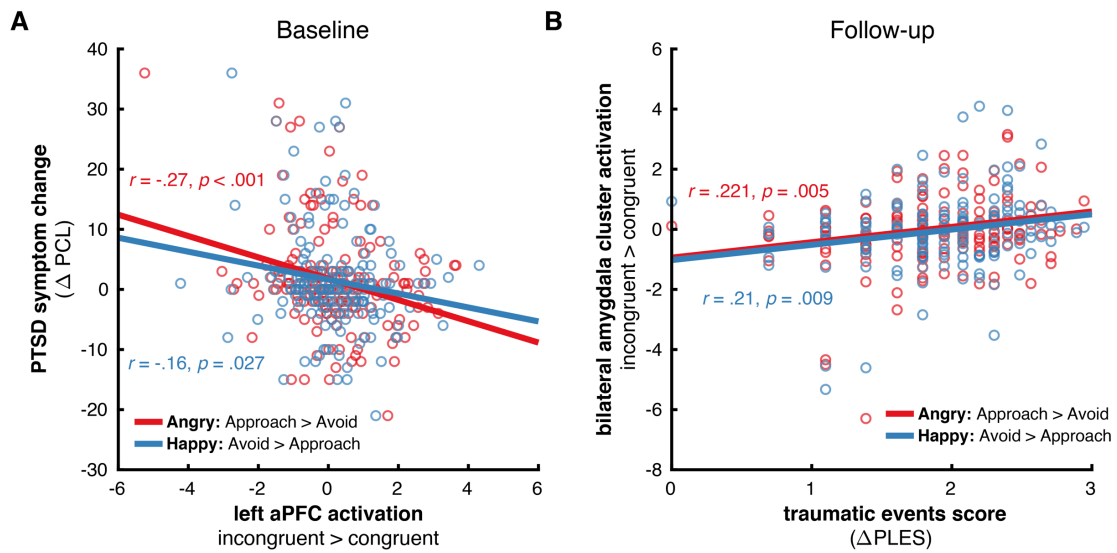

**Supplementary figure 2.** Association between the congruency effect (separately for happy and angry faces) on the neural level and trauma exposure and symptoms. **A.** Left anterior prefrontal cortex activation at baseline negatively predicted symptom increase at follow-up. This effect was similar for the congruency effect on happy and on angry faces. **B.** The increase in traumatic events predicted bilateral amygdala activation at follow-up. This effect was similar for the congruency effect on happy and angry faces.

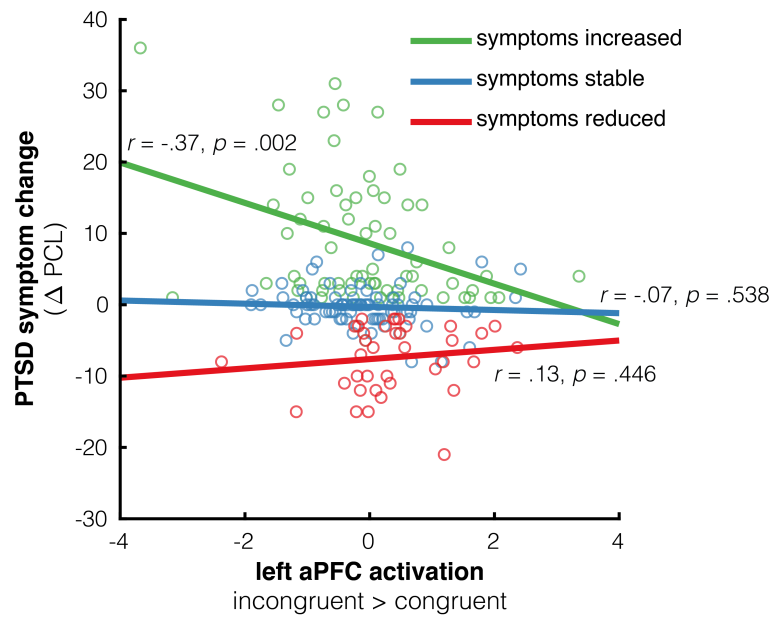

**Supplementary figure 3.** Relationship between anterior PFC activation at baseline and PTSD symptom change for different symptom clusters generated with an automated clustering approach on PTSD symptom change (increase ( $N = 65$ ), stable ( $N = 82$ ), decrease ( $N = 38$ )). PTSD symptom change was significantly associated with left aPFC activation in the symptom increase group, but in the other groups (stable and reduced symptoms).

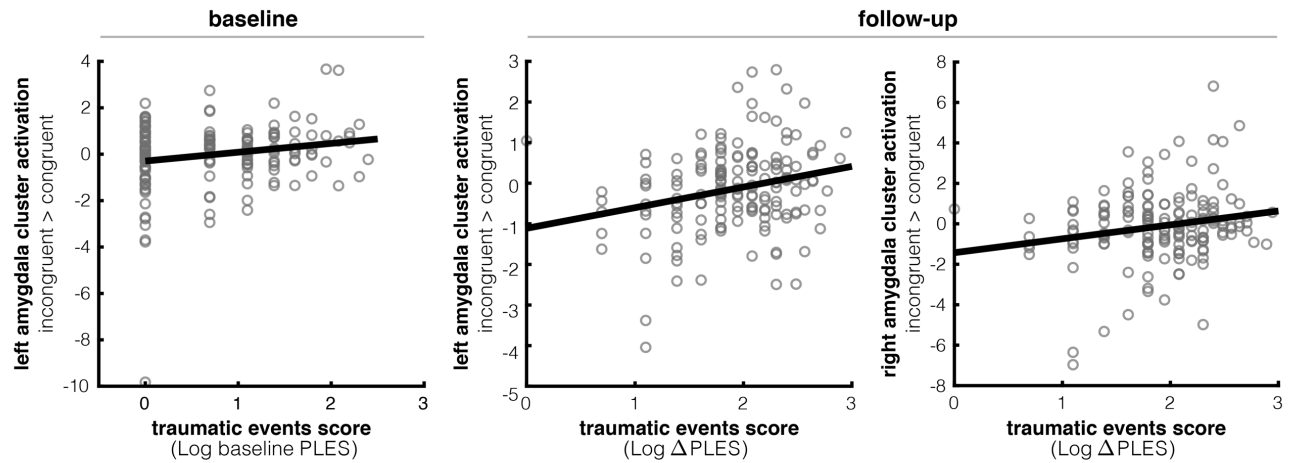

**Supplementary figure 4.** Relationship between traumatic events (PLES) and amygdala activation at baseline and follow-up. Left amygdala activation at baseline was associated with pre-baseline amount of trauma exposure, whereas bilateral amygdala activation at follow-up was associated with amount of trauma exposure between baseline and follow-up (delta-PLES). PLES = Police Life Events Scale <sup>1</sup>.

## Supplementary Tables

| anatomical region                                                | side | cluster size | x   | y   | z   | p      | t    |
|------------------------------------------------------------------|------|--------------|-----|-----|-----|--------|------|
| <i>incongruent &gt; congruent</i>                                |      |              |     |     |     |        |      |
| Anterior prefrontal cortex / Lateral frontal pole <sup>1</sup>   | L    | 190          | -32 | 54  | 6   | .001   | 5.75 |
| Anterior prefrontal cortex / Lateral frontal pole <sup>1</sup>   | R    | 106          | 30  | 52  | 8   | .006   | 4.09 |
| Angular gyrus                                                    | L    | 407          | -34 | -54 | 40  | < .001 | 6.07 |
| Anterior prefrontal cortex / Lateral frontal pole                | R    | 819          | 34  | 48  | 12  | < .001 | 5.88 |
| Anterior prefrontal cortex / Lateral frontal pole                | L    | 376          | -32 | 54  | 6   | < .001 | 5.75 |
| Inferior frontal gyrus                                           | R    | 320          | 56  | 34  | -14 | < .001 | 5.42 |
| Precuneus                                                        | R    | 453          | 10  | -62 | 38  | < .001 | 5.05 |
| Supramarginal gyrus                                              | R    | 412          | 72  | -38 | 16  | < .001 | 4.87 |
| <i>congruent &gt; incongruent</i>                                |      |              |     |     |     |        |      |
| Postcentral gyrus                                                | R    | 911          | 44  | -14 | 22  | < .001 | 6.13 |
| Caudate nucleus                                                  | R    | 251          | 10  | 2   | -12 | < .001 | 6.07 |
| Fusiform gyrus                                                   | L    | 475          | -26 | -34 | -16 | < .001 | 5.97 |
| Frontal medial cortex                                            | L    | 547          | -12 | 36  | -14 | < .001 | 5.6  |
| Superior frontal cortex                                          | L    | 256          | -20 | 34  | 48  | < .001 | 5.57 |
| Postcentral gyrus                                                | L    | 270          | -44 | -16 | 30  | < .001 | 5.5  |
| Precuneus                                                        | R    | 398          | 16  | -48 | 2   | < .001 | 5.31 |
| Superior temporal lobe                                           | L    | 228          | -40 | -22 | -4  | < .001 | 4.98 |
| Precentral gyrus                                                 | R    | 248          | 34  | -18 | 72  | < .001 | 4.42 |
| $\Delta$ -PCL x congruency [ <i>congruent &gt; incongruent</i> ] |      |              |     |     |     |        |      |
| Anterior prefrontal cortex Lateral frontal pole <sup>1</sup>     | L    | 55           | -40 | 58  | -6  | .003   | 4.51 |
| Medial frontal pole/paracingulate gyrus                          | R    | 813          | 4   | 68  | 4   | < .001 | 7.36 |
| Lateral frontal pole                                             | R    | 540          | 46  | 50  | 18  | < .001 | 6.47 |
| Frontal pole (dorsal)                                            | R    | 476          | 24  | 46  | 48  | < .001 | 6.15 |
| Middle temporal gyrus/Lateral occipital lobe                     | L    | 486          | -54 | -80 | -8  | < .001 | 5.97 |
| Posterior cingulate cortex                                       | R    | 295          | 18  | -46 | 32  | < .001 | 5.48 |
| Middle temporal gyrus/Lateral occipital lobe/Fusiform gyrus      | R    | 675          | 46  | -52 | -4  | < .001 | 5.07 |
| Fusiform gyrus/Cerebellum                                        | L    | 224          | -48 | -44 | -26 | < .001 | 4.96 |
| Calcarine cortex                                                 | L    | 297          | -14 | -72 | 16  | < .001 | 4.82 |
| Anterior prefrontal cortex / Lateral frontal pole                | L    | 234          | -40 | 60  | 4   | < .001 | 4.67 |

**Supplementary table 1.** Whole brain effects for the GLM of the baseline AAT task (N = 185). *p*-Values

are FWE-corrected at the cluster level for whole-brain effects (initial cluster forming threshold  $p <$

.001, only results with cluster-level  $p <$  .001 are reported in this table) and at the voxel level for the

volumes of interest (bilateral anterior PFC and amygdala). L = left hemisphere; R = right hemisphere.

Coordinates are given in MNI stereotaxic space.<sup>1</sup> Small-volume corrected



| <b>anatomical region</b>                                                                   | <b>side</b> | <b>cluster size</b> | <b>x</b> | <b>y</b> | <b>z</b> | <b>p</b> | <b>t</b> |
|--------------------------------------------------------------------------------------------|-------------|---------------------|----------|----------|----------|----------|----------|
| <i>incongruent &gt; congruent collapsed over time [baseline + follow-up]</i>               |             |                     |          |          |          |          |          |
| Lateral frontal pole / anterior prefrontal cortex <sup>1</sup>                             | L           | 102                 | -32      | 58       | 6        | 0.002    | 4.56     |
| Angular gyrus                                                                              | L           | 231                 | -34      | -52      | 36       | < 0.001  | 4.87     |
| Precuneus                                                                                  | L/R         | 221                 | 2        | -74      | 50       | < 0.001  | 4.44     |
| <i>congruent &gt; incongruent collapsed over time [baseline + follow-up]</i>               |             |                     |          |          |          |          |          |
| Amygdala <sup>1</sup>                                                                      | L           | 97                  | -24      | -8       | -12      | 0.001    | 4.64     |
| Postcentral gyrus                                                                          | L           | 2411                | -38      | -18      | 20       | < 0.001  | 5.56     |
| Fusiform gyrus/Inferior temporal gyrus                                                     | R           | 317                 | 46       | -46      | -18      | < 0.001  | 5.35     |
| Postcentral gyrus                                                                          | R           | 591                 | 38       | -14      | 20       | < 0.001  | 5.11     |
| Mid temporal gyrus                                                                         | R           | 260                 | 56       | -66      | 22       | < 0.001  | 4.89     |
| Frontal medial cortex                                                                      | L/R         | 396                 | -10      | 44       | -14      | < 0.001  | 4.65     |
| <i>time [follow-up vs. baseline] x congruency [incongruent &gt; congruent]</i>             |             |                     |          |          |          |          |          |
| Precuneus                                                                                  | L/R         | 713                 | -2       | -46      | 14       | < 0.001  | 5.11     |
| <i>time [baseline vs. follow-up] x congruency [incongruent &gt; congruent]</i>             |             |                     |          |          |          |          |          |
| Mid/Inferior Temporal lobe                                                                 | L           | 525                 | -46      | 6        | -30      | < 0.001  | 5.02     |
| Amygdala                                                                                   | R           | 1290                | 34       | 0        | -22      | < 0.001  | 4.78     |
| <i>delta-PCL x time [follow-up vs. baseline] x congruency [incongruent &gt; congruent]</i> |             |                     |          |          |          |          |          |
| Lateral frontal pole / anterior prefrontal cortex <sup>1</sup>                             | L           | 59                  | -40      | 58       | 4        | 0.009    | 4.16     |
| Posterior cingulate cortex                                                                 | R           | 313                 | 24       | -44      | 34       | < 0.001  | 5.98     |
| Medial frontal pole                                                                        | R           | 314                 | 8        | 74       | 0        | < 0.001  | 5.11     |
| Dorsal frontal pole                                                                        | R           | 252                 | 20       | 50       | 46       | < 0.001  | 5.01     |
| <i>Δ-PLES x time [follow-up vs. baseline] x congruency [incongruent &gt; congruent]</i>    |             |                     |          |          |          |          |          |
| Amygdala <sup>1</sup>                                                                      | L           | 83                  | -28      | -2       | -16      | < 0.001  | 5.12     |
| Amygdala <sup>1</sup>                                                                      | R           | 37                  | 22       | 2        | -20      | 0.017    | 3.72     |
| Pre/postcentral, inferior parietal                                                         | L           | 2127                | -34      | -12      | 58       | < 0.001  | 5.62     |
| <i>Δ-PLES x time [baseline vs. follow-up] x congruency [incongruent &gt; congruent]</i>    |             |                     |          |          |          |          |          |
| Medial frontal pole/paracingulate gyrus                                                    | L           | 452                 | -4       | 46       | 0        | < 0.001  | 4.98     |
| Anterior cingulate cortex                                                                  | L/R         | 231                 | 0        | 32       | 20       | < 0.001  | 4.53     |

**Supplementary table 2.** Whole brain effects for GLM of the baseline and follow-up AAT task data (N = 160). *p*-Values are FWE-corrected at the cluster level for whole-brain effects (initial cluster forming threshold  $p < .001$ ) and at the voxel level for the volumes of interest (bilateral anterior PFC and amygdala). L = left hemisphere; R = right hemisphere. Coordinates are given in MNI stereotaxic space. <sup>1</sup> Small-volume corrected

## References

1. Carlier, I. V. E. & Gersons, B. P. R. Development of a scale for traumatic incidents in police work. *Psychiatr. Fenn.* **23**, 59–70 (1992).
